# Supplementary material for: Non-stoichiometry and its implications for the properties of PMN–PT thin films
Source: Royal Society of Chemistry journal article supplement (doi:10.1039/d2tc04070k), 2022-12-20

## ***Supplementary Information***

### **Non-stoichiometry and its implications for the properties of PMN-PT thin films**

Urška Trstenjak<sup>a</sup>, Nina Daneu<sup>a</sup>, Jamal Belhadi<sup>a</sup>, Zoran Samardžija<sup>b</sup>, Aleksander Matavž<sup>c</sup>, Vid Bobnar<sup>c,d</sup>, Gertjan Koster<sup>a,e</sup>, Matjaž Spreitzer<sup>a,\*</sup>

<sup>a</sup> *Advanced Materials Department, Jožef Stefan Institute, Jamova cesta 39, 1000 Ljubljana, Slovenia*

<sup>b</sup> *Department for Nanostructured Materials, Jožef Stefan Institute, Jamova cesta 39, 1000 Ljubljana, Slovenia*

<sup>c</sup> *Condensed Matter Physics Department, Jožef Stefan Institute, Jamova cesta 39, 1000 Ljubljana, Slovenia*

<sup>d</sup> *Jožef Stefan International Postgraduate School, Jamova cesta 39, 1000 Ljubljana, Slovenia*

<sup>e</sup> *Faculty of Science and Technology and MESA+ Institute for Nanotechnology, University of Twente, P.O. Box 217, 7500 AE Enschede, the Netherlands*

**S1: FWHM values,  $a$  and  $c$  values from RSMs and calculated  $a_{pc}$  values**

| <b>Sample name</b> | <b>FWHM (<math>\theta</math>-<math>2\theta</math>)</b> | <b><math>a</math></b> | <b><math>c</math></b> | <b><math>a_{pc}</math></b> | <b>FWHM (RC)</b> |
|--------------------|--------------------------------------------------------|-----------------------|-----------------------|----------------------------|------------------|
| <i>0P0M</i>        | 0.064                                                  | 4.029                 | 4.014                 | 4.024                      | 0.29             |
| <i>20P0M</i>       | 0.148                                                  | 4.026                 | 4.024                 | 4.025                      | 0.42             |
| <i>10P10M</i>      | 0.066                                                  | 4.027                 | 4.024                 | 4.026                      | 0.28             |
| <i>20P10M</i>      | 0.103                                                  | 4.019                 | 4.028                 | 4.022                      | 0.38             |
| <i>20P20M</i>      | 0.084                                                  | 4.020                 | 4.026                 | 4.022                      | 0.30             |

**S2: AFM micrographs of the PMN-PT thin films**

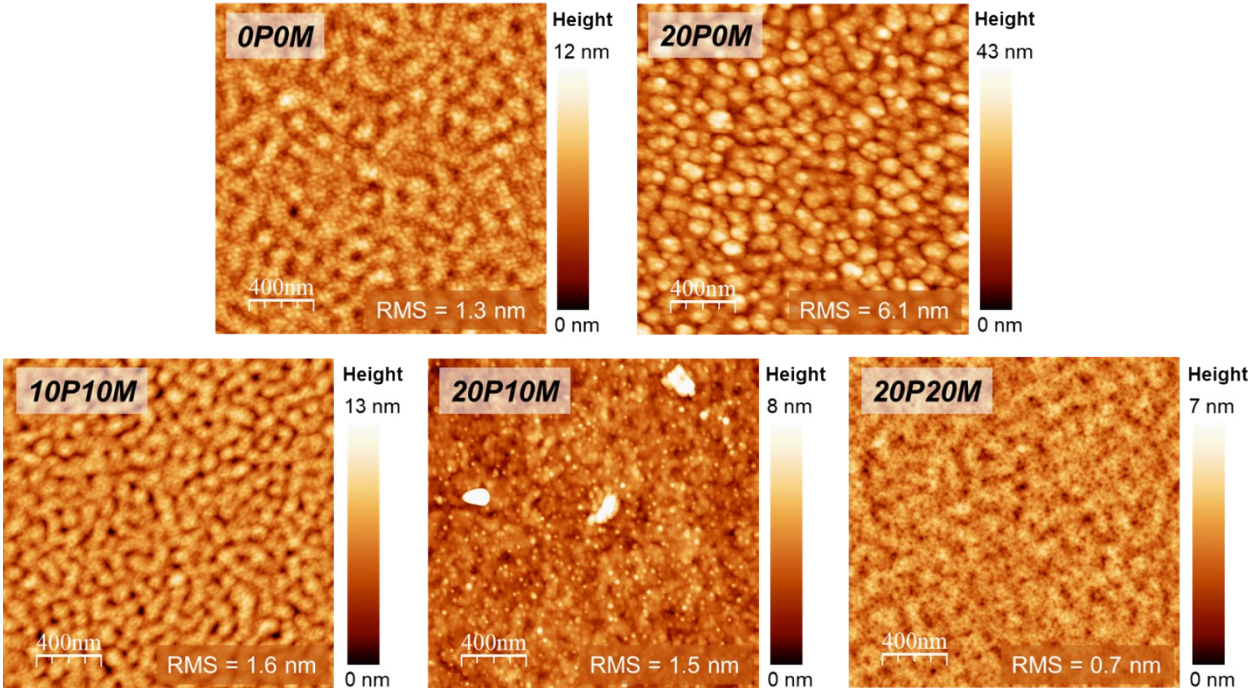

S3: STEM cross-section of the LNO layer, revealing the RP-type defects

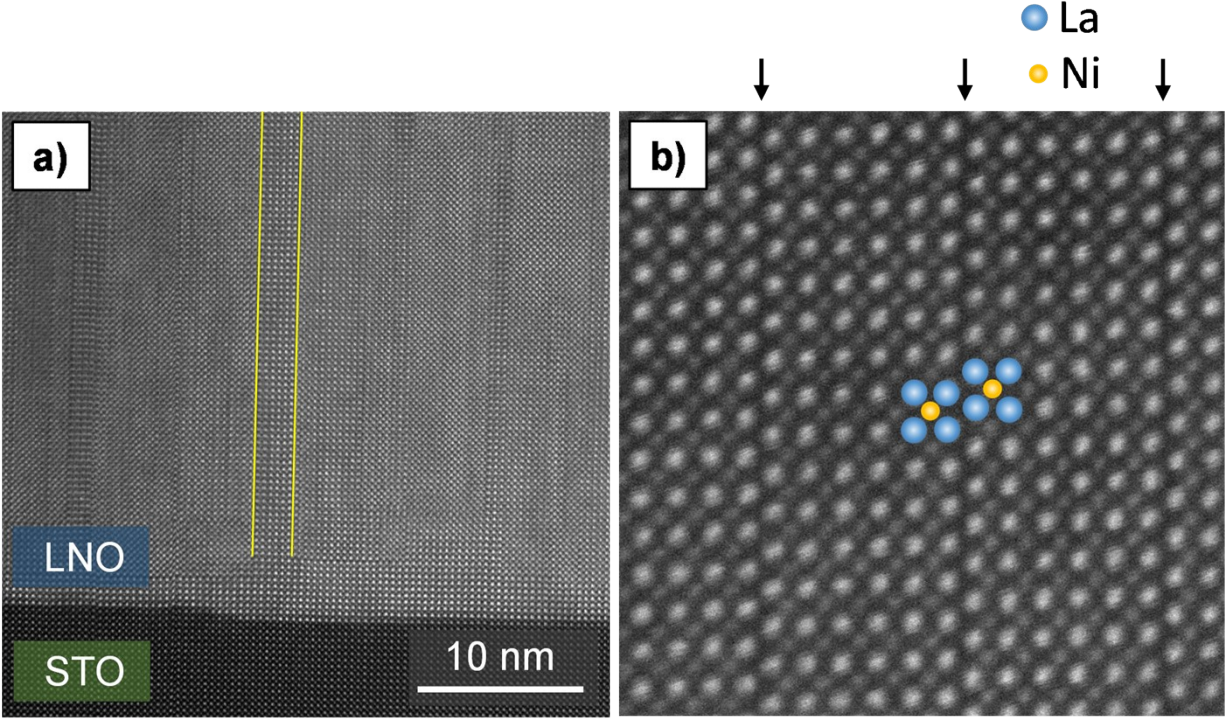

Supplement: d2tc04070k1.pdf [file d2tc04070k1.pdf]
